# Supplementary material
Source: ML conference proceedings conference paper supplement (https://openreview.net/forum?id=KAIyxWrP9-)
Supplement: supplementary_material [file attachment]

## A Finding an Initial Good Center

In this section we give, for completeness, the  $\rho$ -zCDP version of the algorithms for approximating  $P$ 's optimal radius up to a constant factor and finding some  $\theta_0$  which is sufficiently close to the center of  $P$ 's MEB. The algorithm itself is ridiculously simple, and has appeared before implicitly. We bring it here for two reasons: (a) completeness and (b) in its LDP-version, this algorithm's utility depends solely on  $\sqrt{n}$ . Thus, combining this algorithm with the Algorithm 5 of Section 5, we obtain a LDP-fPTAS for the MEB problem whose utility depends on  $\sqrt{n}$  rather than the  $n^{0.67}$ -bound of [31] (at the expense of worse dependency on other parameters). This gives a clear improvement on previous algorithms for approximating the MEB problem when  $n \rightarrow \infty$ . Our algorithm requires a starting point  $\theta_0$  which is  $R_{\max}$  away from all points in  $P$  (namely,  $P \subset B(\theta_0, R_{\max})$ ), and a lower bound  $r_{\min}$  on  $r_{\text{opt}}$ ; and its overall utility bounds depends on  $\log(R_{\max}/r_{\min})$ . In a standard setting, where  $P \subset [-B, B]^d$  and where all points lie on some grid  $\mathcal{G}^d$  whose step-size is  $\tau$ , we can set  $\theta_0$  as the origin and set  $R_{\max} = B\sqrt{d}$  and  $r_{\min} = \tau/2$ , resulting in  $O(\log(Bd/\tau))$ -dependency. In the specific case where  $r_{\text{opt}} = 0$  and all datapoints in  $P$  lie on the exact same grid point we can just return the closest grid point to the resulting  $\theta$  once it get to a radius of  $r = r_{\min} = \tau/2$ .

---

### Algorithm 6 Noisy Average and Radius (GoodCenter)

---

**Input:** a set of  $n$  points  $P$  and parameters  $\theta_0, R_{\max}$  and  $r_{\min}$ , such that  $P \subset B(\theta_0, R_{\max})$  and  $r_{\text{opt}} \geq r_{\min}$ . Failure parameter  $\beta \in (0, 1)$ , privacy parameter  $\rho$ .

- 1: Set  $T \leftarrow \lceil \log_2(R_{\max}/r_{\min}) \rceil + 1$ ,  $X \leftarrow \sqrt{\frac{2T \ln(4T/\beta)}{\rho}}$
  - 2: Set  $\sigma_{\text{count}}^2 \leftarrow \frac{T}{\rho}$ ,  $\sigma_{\text{sum}}^2 \leftarrow \frac{T}{\rho}$ .
  - 3: Init  $P^0 \leftarrow P$ ,  $\theta^0 \leftarrow \theta_0$ ,  $n_{\text{cur}} \leftarrow n$  and  $r_{\text{cur}} \leftarrow R_{\max}$ .
  - 4: **for** ( $t = 0, 1, 2, \dots, T - 1$ ) **do**
  - 5:      $P^t \leftarrow P^t \cap B(\theta^t, r_{\text{cur}})$ .
  - 6:      $\Delta_{\text{sum}} \sim \mathcal{N}(0, 4r_{\text{cur}}^2 \sigma_{\text{sum}}^2 I_d)$
  - 7:      $\tilde{\mu}^t \leftarrow (\sum_{x \in P^t} x + \Delta_{\text{sum}})/n_{\text{cur}}$
  - 8:      $\Delta_{\text{count}} \leftarrow \mathcal{N}(0, \sigma_{\text{count}}^2)$
  - 9:     **if** ( $|P^t \setminus B(\tilde{\mu}^t, \frac{1}{2}r_{\text{cur}})| + \Delta_{\text{count}} \geq X$ ) **then return**  $B(\theta^t, r_{\text{cur}})$
  - 10:    Update:  $r_{\text{cur}} \leftarrow \frac{1}{2}r_{\text{cur}}$ ,  $n_{\text{cur}} \leftarrow n_{\text{cur}} - 2X$ ,  $\theta^{t+1} \leftarrow \tilde{\mu}^t$ .
  - 11: **return**  $B(\theta^T, r_{\text{cur}})$
- 

**Theorem A.1.** *Algorithm 6 is  $\rho$ -zCDP.*

*Proof.* The proof follows immediately from the fact that the  $L_2$ -global sensitivity of a count query is 1, and that the  $L_2$ -global sensitivity of a sum of datapoints in a ball of radius  $r_{\text{cur}}$  is at most  $2r_{\text{cur}}$ . The rest of the proof relies on the composition of  $2T$  queries, each answered with a ‘‘budget’’ of  $\frac{\rho}{2T}$ -zCDP.  $\square$

**Theorem A.2.** *W.p.  $\geq 1 - \beta$ , given a set of points  $P$  of size  $n$  where  $n \geq \max\{16T \sqrt{\frac{2T \ln(4T/\beta)}{\rho}}, 16\sqrt{\frac{T}{\rho}}(\sqrt{d} + \sqrt{2 \ln(4T/\beta)})\}$ , Algorithm 6 returns a ball  $B(\theta^*, r^*)$  where (i) the set  $P' = P \cap B(\theta^*, r^*)$  contains at least  $n - \sqrt{\frac{8T^3 \ln(4T/\beta)}{\rho}}$ , and (ii) denoting  $B(\theta(P'), r_{\text{opt}}(P'))$  as the MEB of  $P'$ , we have that  $r^* \leq 6r_{\text{opt}}$ .*

*Proof.* Let  $\mathcal{E}$  be the event where for any of the  $\leq T$  draws of the  $\Delta_{\text{sum}}$  and  $\Delta_{\text{count}}$  it holds that

$$|\Delta_{\text{count}}| \leq \sqrt{\frac{2T \ln(4T/\beta)}{\rho}} \quad \text{and} \quad \|\Delta_{\text{sum}}\| \leq 2r_{\text{cur}} \sqrt{\frac{T}{\rho}}(\sqrt{d} + \sqrt{2 \ln(4T/\beta)})$$

where again, standard union bound and Gaussian /  $\chi^2$ -distribution concentration bounds give that  $\Pr[\bar{\mathcal{E}}] \leq \beta$ . So we continue the proof under the assumption that  $\mathcal{E}$  holds.

In this case, in any iteration it must hold that  $|P \setminus B(\mu^t, \frac{1}{2}r_{\text{cur}})| \leq 2X = \sqrt{\frac{8T \ln(4T/\beta)}{\rho}}$ . It follows that all in all we remove in the process of Algorithm 6 at most  $2XT$  points, and since  $n \geq 16XT$

we have that in any iteration  $t$  it always holds that  $n \geq |P^t| \geq n - 2Xt = n_{cur} \geq \frac{7n}{8} \geq 14XT$ . Denoting in any iteration  $t$  the true mean of the points (remaining) in  $P^t$  as  $\mu_t = \frac{1}{|P^t|} \sum_{x \in P^t} x$ , and the center of the MED of  $P^t$  as  $\theta_t$ , it follows that

$$\begin{aligned} \|\tilde{\mu}^t - \mu^t\| &= \|\tilde{\mu}^t - \theta_t - (\mu^t - \theta_t)\| = \left\| \frac{\Delta_{sum} + \sum_{x \in P^t} (x - \theta_t)}{n_{cur}} - \frac{\sum_{x \in P^t} (x - \theta_t)}{|P^t|} \right\| \\ &\leq \left\| \frac{\Delta_{sum}}{n_{cur}} \right\| + \left\| \frac{(\sum_{x \in P^t} (x - \theta_t)) (|P^t| - n_{cur})}{|P^t| n_{cur}} \right\| \leq \frac{8\|\Delta_{sum}\|}{7n} + \|\mu^t - \theta_t\| \frac{2XT}{n_{cur}} \\ &\leq \frac{8 \cdot 2r_{cur} \sqrt{\frac{T}{\rho}} (\sqrt{d} + \sqrt{2 \ln(4T/\beta)})}{7n} + \frac{r_{opt}(P^t)}{7} \leq \frac{r_{cur} + r_{opt}(P^t)}{7} \end{aligned}$$

Since we assume  $n \geq 16 \sqrt{\frac{T}{\rho}} (\sqrt{d} + \sqrt{2 \ln(4T/\beta)})$ . Moreover, since  $\|\mu^t - \theta_t\| \leq r_{opt}(P^t)$  it follows that  $\|\tilde{\mu}^t - \theta_t\| \leq \frac{r_{cur} + 8r_{opt}(P^t)}{7}$ . Now, as long as  $r_{cur} \geq 6r_{opt}(P^t)$  we have that

$$\frac{r_{cur}}{2} \geq \frac{r_{cur}}{7} + \frac{5r_{cur}}{14} \geq \frac{r_{cur}}{7} + \frac{30r_{opt}(P^t)}{14} \geq r_{opt}(P^t) + \frac{r_{cur} + 8r_{opt}(P^t)}{7} \geq r_{opt}(P^t) + \|\tilde{\mu}^t - \theta_t\|$$

thus  $B(\theta_t, r_{opt}(P^t)) \subset B(\tilde{\mu}^t, \frac{r_{cur}}{2})$  which implies that  $|P^t \setminus B(\mu^t, \frac{1}{2}r_{cur})| = 0$ , and so under  $\mathcal{E}$  we continue to the next iteration.

And so, when we halt it must hold that  $r_{cur}$  (which is the  $r^*$  we return) must satisfy that  $r_{cur} < 6r_{opt}(P^t)$ .  $\square$

**Corollary A.3.** Algorithm 6 is a  $\rho$ -zCDP algorithm that, given  $n$  points on a grid  $\mathcal{G} \subset [-B, B]^d$  of side-step  $\tau$  where  $n = \Omega(\sqrt{\frac{\log(Bd/\tau)}{\rho}} (\sqrt{d} + \sqrt{\log(Bd/\tau\beta)}))$  returns w.p.  $\geq 1 - \beta$  a ball  $B(\theta^*, r^*)$  where for  $P' = P \setminus B(\theta^*, r^*)$  it holds that both  $n - |P'| = O(\frac{\log(Bd/\tau)}{\sqrt{\rho}} \sqrt{\log(Bd/\tau\beta)})$  and that w.r.t to  $B(\theta_{opt}, r_{opt})$  which is the true MEB of  $P'$  we have that  $\|\theta^* - \theta_{opt}\| \leq 6r_{opt}(P')$ .

## A.1 A Local-DP Version of Finding an Initial Good Center

---

### Algorithm 7 LDP Noisy Average and Radius (LDP-GoodCenter)

---

**Input:** a set of  $n$  points  $P$  and some parameter  $R_{max}, \theta_0$  and  $r_{min}$ , such that  $P \subset B(\theta_0, R_{max})$  and  $r_{opt} \geq r_{min}$ . Failure parameter  $\beta \in (0, 1)$ , privacy parameter  $\rho$ .

- 1: Set  $T \leftarrow \lceil \log_2(R_{max}/r_{min}) \rceil + 1$ ,  $X \leftarrow \sqrt{\frac{2nT \ln(4T/\beta)}{\rho}}$
  - 2:  $\sigma_{count}^2 \leftarrow \frac{T}{\rho}$ ,  $\sigma_{sum}^2 \leftarrow \frac{T}{\rho}$ .
  - 3: Init  $\theta^0 \leftarrow \theta_0$ , and  $r_{cur} \leftarrow R_{max}$ .
  - 4: **for** ( $t = 0, 1, 2, \dots, T - 1$ ) **do**
  - 5:     Denote  $\Pi^t$  as the projection onto  $B(\theta^t, r_{cur})$ .
  - 6:     **for each**  $x \in P$  **do**
  - 7:         Send  $Y_x \sim \mathcal{N}(\Pi^t(x), 4r_{cur}^2 \sigma_{sum}^2 I_d)$
  - 8:      $\tilde{\mu}^t \leftarrow \frac{1}{n} \sum_x Y_x$
  - 9:     **for each**  $x \in P$  **do**
  - 10:         **if** ( $x \notin B(\tilde{\mu}^t, \frac{1}{2}r_{cur})$ ) **then**
  - 11:             Send  $Z_x \sim \mathcal{N}(1, \sigma_{count}^2)$
  - 12:         **else** Send  $Z_x \sim \mathcal{N}(0, \sigma_{count}^2)$
  - 13:     **if** ( $\sum_x Z_x \geq X$ ) **then return**  $B(\theta^t, r_{cur})$
  - 14:     Update:  $r_{cur} \leftarrow \frac{1}{2}r_{cur}$ ,  $\theta^{t+1} \leftarrow \tilde{\mu}^t$ .
  - 15: **return**  $B(\theta^T, r_{cur})$
- 

**Theorem A.4.** Algorithm 7 is a LDP algorithm in which each user maintains  $\rho$ -zCDP. Furthermore, w.p.  $\geq 1 - \beta$ , given a set of point  $P$  of size  $n$  where  $n \geq \max\{16T \sqrt{\frac{2nT \ln(4T/\beta)}{\rho}}, 16 \sqrt{\frac{nT}{\rho}} (\sqrt{d} +$

$\sqrt{2 \ln(4T/\beta)}\}$ , Algorithm 7 returns a ball  $B(\theta^*, r^*)$  where the set  $P' = \{\Pi_{B(\theta^*, r^*)}(x) : x \in P\}$  contains no more than  $2T \sqrt{\frac{2T \ln(4T/\beta)}{\rho}}$  points for which  $x \neq \Pi_{B(\theta^*, r^*)}(x)$ ; and denoting  $B(\theta(P'), r_{opt}(P'))$  as the MEB of  $P'$ , it holds that  $\|\theta^* - \theta(P')\| \leq 8r^*$ .

The proof of Theorem A.4 is completely analogous to the proof of Theorems A.1 and A.2 using the fact that in each iteration  $t$  of the algorithm

$$\begin{aligned} \sum_x Y_x &\sim \mathcal{N}\left(\sum_x \Pi^t(x), 4nr_{cur}^2 \sigma_{sum}^2 I_d\right) \\ \sum_x Z_x &\sim \mathcal{N}(|\{x \in P : x \notin B(\tilde{\mu}^t, r_{cur}/2)\}|, n\sigma_{count}^2) \end{aligned}$$

**Corollary A.5.** Algorithm 7 is a  $\rho$ -zCDP algorithm in the local-model that, given  $n$  points on a grid  $\mathcal{G} \subset [-B, B]^d$  of side-step  $\tau$  where  $n = \Omega\left(\frac{\log(Bd/\tau)}{\rho} (\sqrt{d} + \sqrt{\log(Bd/\tau\beta)})^2\right)$  returns w.p.  $\geq 1 - \beta$  a ball  $B(\theta^*, r^*)$  where for the set  $P' = \{\Pi_{B(\theta^*, r^*)}(x) : x \in P\}$  it holds that at most  $O\left(\frac{\sqrt{n \cdot \log(Bd/\tau)}}{\sqrt{\rho}} \sqrt{\log(Bd/\tau\beta)}\right)$  points are shifted in the projection (and the rest remain as they are in  $P$ ) and that w.r.t to  $B(\theta_{opt}, r_{opt})$  which is the true MEB of  $P'$  we have that  $\|\theta^* - \theta_{opt}\| \leq 6r^*$ .

Note that comparing Corollary A.5 with the approximation of [31], we have that they may omit  $O(n^{0.67} \log(n/\tau))$ -many points whereas we may omit only  $\sqrt{n} \log^{3/2}(d/\tau)$  points. But, of course, they deal with a bounding ball for  $t$  points out of giving  $n$ , whereas we deal with the MEB problem.

## B Using Noisy Mean

Here we continue the analysis detailed in Section 3.1. For completeness, we also bring the SQ-model version of the algorithm where in each iteration we obtain an approximated center  $\tilde{\mu}^t$  where  $\Delta^t = \tilde{\mu}_w^t - \mu_w^t$  is of magnitude proportional to  $\gamma r$ . We modify Algorithm 2 so that our update scale shrinks by a constant factor to  $\gamma^2/8$ , namely we set  $\theta^{t+1} \leftarrow (1 - \frac{\gamma^2}{8})\theta^t + \frac{\gamma^2}{8}\tilde{\mu}_w^t$ . We now prove that the revised algorithm still converges to a point close to  $\theta_{opt}$ .

**Lemma B.1.** Applying Algorithm 2 with any  $4r_{opt} \geq r \geq r_{opt}$  and any  $\theta_0$  where  $\|\theta_0 - \theta_{opt}\| \leq 10r_{opt}$ , where in each iteration we use an approximated mean  $\tilde{\mu}_w^t = \mu_w^t + \Delta^t$  where  $\|\Delta^t\| \leq \frac{\gamma r}{16} \leq \frac{\gamma r_{opt}}{4}$  we obtain a  $\theta$  where  $\|\theta - \theta_{opt}\| \leq \gamma r_{opt}$  in at most  $16T = \frac{64}{\gamma^2} \ln(100/\gamma^2)$  iterations.

*Proof.* First, analogously to Lemma 3.2 we have that in each update step we get

$$\begin{aligned} \|\theta^{t+1} - \theta_{opt}\|^2 &= \left\| \left( \left(1 - \frac{\gamma^2}{8}\right)\theta^t + \frac{\gamma^2}{8}\tilde{\mu}_w^t \right) - \theta_{opt} \right\|^2 = \left(1 - \frac{\gamma^2}{8}\right)^2 \cdot \|\theta^t - \theta_{opt}\|^2 \\ &\quad + 2\frac{\gamma^2}{8}\left(1 - \frac{\gamma^2}{8}\right) (\langle \theta^t - \theta_{opt}, \mu_w^t - \theta_{opt} \rangle + \langle \theta^t - \theta_{opt}, \Delta^t \rangle) + \left(\frac{\gamma^2}{8}\right)^2 \cdot \|\mu_w^t - \theta_{opt} + \Delta^t\|^2 \\ &\leq \left(1 - \frac{\gamma^2}{8}\right)^2 \cdot \|\theta^t - \theta_{opt}\|^2 + 2\left(\frac{\gamma^2}{8} - \frac{\gamma^4}{64}\right) \cdot \left(\frac{1}{2}\|\theta^t - \theta_{opt}\|^2 + \|\theta^t - \theta_{opt}\| \cdot \frac{\gamma r_{opt}}{4}\right) \\ &\quad + \left(\frac{\gamma^2}{8}\right)^2 \cdot \left(2\|\mu_w^t - \theta_{opt}\|^2 + 2\frac{\gamma^2 r_{opt}^2}{4^2}\right) \\ &\leq \left(1 - \frac{\gamma^2}{8}\right)^2 \|\theta^t - \theta_{opt}\|^2 + 2\left(\frac{\gamma^2}{8} - \frac{\gamma^4}{64}\right) \cdot \|\theta^t - \theta_{opt}\| \left(\frac{1}{2}\|\theta^t - \theta_{opt}\| + \frac{\gamma r_{opt}}{4}\right) + \frac{3\gamma^4}{64} r_{opt}^2 \end{aligned}$$

It follows that in each iteration where  $\|\theta^t - \theta_{opt}\| \geq \gamma r_{opt}$  we get that

$$\begin{aligned} \|\theta^{t+1} - \theta_{opt}\|^2 &\leq \left(1 - \frac{2\gamma^2}{8} + \frac{\gamma^4}{64}\right) \|\theta^t - \theta_{opt}\|^2 + 2\left(\frac{\gamma^2}{8} - \frac{\gamma^4}{64}\right) \cdot \frac{3}{4} \|\theta^t - \theta_{opt}\|^2 + \frac{3\gamma^4 r_{opt}^2}{64} \\ &< \left(1 - \frac{\gamma^2}{16}\right) \|\theta^t - \theta_{opt}\|^2 + \frac{3\gamma^2}{64} \|\theta^t - \theta_{opt}\|^2 = \left(1 - \frac{\gamma^2}{64}\right) \|\theta^t - \theta_{opt}\|^2 \end{aligned}$$

suggesting that after  $16T = \frac{64}{\gamma^2} \ln(100/\gamma^2)$  iteration at most it must hold that

$$\|\theta^{16T} - \theta_{opt}\|^2 \leq \exp\left(-\frac{64}{\gamma^2} \ln(100/\gamma^2) \cdot \frac{\gamma^2}{64}\right) \|\theta_0 - \theta_{opt}\|^2 \leq \frac{\gamma^2}{100} \cdot 100r_{opt}^2 = \gamma^2 r_{opt}^2$$

As required. Similarly, if at some iteration  $t$  it holds that  $\|\theta^t - \theta_{opt}\| < \gamma r_{opt}$  then we get that

$$\begin{aligned} \|\theta^{t+1} - \theta_{opt}\|^2 &\leq \left(1 - \frac{\gamma^2}{8}\right)^2 \gamma^2 r_{opt}^2 + 2\left(\frac{\gamma^2}{8} - \frac{\gamma^4}{64}\right) \cdot \frac{3}{4} \gamma^2 r_{opt}^2 + \frac{3\gamma^4 r_{opt}^2}{64} \\ &\leq \gamma^2 r_{opt}^2 \left(1 - \frac{2\gamma^2}{8} + \frac{\gamma^4}{64} + \frac{3\gamma^2}{2 \cdot 8} - \frac{3\gamma^4}{2 \cdot 64} + \frac{3\gamma^2}{64}\right) \leq \left(1 - \frac{\gamma^2}{64}\right) \gamma^2 r_{opt}^2 \end{aligned}$$

suggesting yet again that  $\|\theta^\tau - \theta_{opt}\| < \gamma r_{opt}$  for all  $\tau \geq t$ .  $\square$

## C Missing Proofs: DP Algorithm

### C.1 Privacy Analysis

**Lemma C.1.** Algorithm 4 satisfies  $\rho$ -zCDP.

*Proof.* At each one of the  $RT$  iterations of the algorithm, we answer two queries to the input data: a counting query and a summation query. It is known that the  $L_2$ -sensitivity of a counting query is 1, therefore using the Gaussian mechanism theorem while setting  $\sigma_{count}^2 = \frac{R(T+1)}{\rho}$  satisfies  $\frac{\rho}{2R(T+1)}$ -zCDP. Secondly, we know that all the points are bounded by a ball of radius  $11r_0 \leq 44r_{opt} \leq 44r$  around  $\theta_0$ , hence the summation query has  $L_2$ -sensitivity of  $\leq 88r$ . Thus, by setting  $\sigma_{sum}^2 = \frac{RT(88r)^2}{\rho}$  we have that we answer each summation query using  $\frac{\rho}{2T}$ -zCDP. Due to sequential composition of zCDP [9], it holds that in all  $T$  iteration together we preserve  $\left(\rho\left(1 - \frac{1}{2R(T+1)}\right)\right)$ -zCDP. Lastly, we apply one last counting query which we answer using the Gaussian mechanism while satisfying  $\frac{\rho}{2R(T+1)}$ -zCDP, thus, overall we are  $\rho$ -zCDP.  $\square$

**Corollary C.2.** Algorithm 3 satisfies  $\rho$ -zCDP.

*Proof.* Since Algorithm 3 invokes  $B = \lceil \log_2(\log_{1+\gamma}(4)) \rceil$  calls to Algorithm 4 each preserving  $\frac{\rho}{B}$ -zCDP, Algorithm 3 is  $\rho$ -zCDP overall.  $\square$

### C.2 Utility Analysis and Sample Complexity

**Corollary C.3.** [Corollary 4.2 restated] Given  $r_0$  where  $r_{opt} \leq r_0 \leq 4r_{opt}$  and a point  $\theta_0$  where  $\|\theta_0 - \theta^*\| \leq 10r_{opt}$ , w.p.  $\geq 1 - \beta$  Algorithm 3 is a  $O\left(n \cdot \frac{\log^2(1/\gamma) \log(1/\beta)}{\gamma^2}\right)$ -time algorithm that returns a ball  $B(\theta^*, r)$  where  $r \leq (1 + 3\gamma)r_{opt}$  and where  $|P \setminus B(\theta^*, r^*)| = O\left(\frac{\left(\sqrt{d} + \sqrt{\log(\log(1/\beta)/\gamma)}\right) \sqrt{\log(1/\gamma) \log(1/\beta)}}{\gamma \sqrt{\rho}}\right)$ .

*Proof.* The result follows directly from the fact that Algorithm 3 invokes  $B = O(\log(1/\gamma))$  calls to Algorithm 4, with a privacy budget of  $O(\rho/\log(1/\gamma))$  each and with a failure probability of  $O(\beta/\log(1/\gamma))$  each. Plugging those into the bound of Lemma 4.1 together with the fact that  $T = O(\gamma^{-2} \log(1/\gamma))$  yields the resulting bound. Note that, denoting the ‘‘correct’’  $i^* = \min\{i \geq 0 : \frac{r_0}{4}(1 + \gamma)^i \geq r_{opt}\}$ , under the event that no invocation of Algorithm 4 fails, each time we execute the binary search with a value of  $i_{cur} \geq i^*$  we obtain some  $\theta_{cur} \neq \perp$ . Due to the nature of the binary search and the fact that upon finding  $\theta_{cur} \neq \perp$  we set  $i_{max} = i_{cur}$ , it must follow that we return a ball of radius  $(1 + \gamma)r^* = (1 + \gamma) \cdot \frac{r_0}{4} \cdot (1 + \gamma)^i$  for some  $i \leq i^*$ , and so  $r^* \leq (1 + \gamma)^2 r_{opt} \leq (1 + 3\gamma)r_{opt}$ . Lastly, the runtime of Algorithm 4 is  $O(nRT)$  making the runtime of Algorithm 3 to be  $O(nRTB) = O\left(\frac{n \log^2(1/\gamma) \log(1/\beta)}{\gamma^2}\right)$  as required.  $\square$

### C.3 Application: Subsample Stable Functions

Much like the work of [21], our work too is applicable as a DP-aggregator in a Subsample-and-Aggregate [30] framework. We say that a point  $p \in \mathbb{R}^d$  is  $(r, \beta)$ -stable for some function  $f : \mathcal{X}^* \rightarrow \mathbb{R}^d$  if there exists  $m(r, \beta)$  such that for any input  $S \subset \mathcal{X}^n$  a random subsample of  $m$  entries of  $S$  input datapoints returns w.p.  $\geq 1 - \beta$  a value close to  $p$ , namely,  $\Pr_{S' \subset S, |S'|=m}[\|c - f(S')\| \leq r] \geq 1 - \beta$ .

**Theorem C.4.** Fix  $\rho, \gamma, \beta > 0$ . There exists some constant  $C > 0$  such that the following holds. Suppose  $f : \mathcal{X}^* \rightarrow \mathbb{R}^d$  is a function that has a  $(r, \beta)$ -stable point. Then, there exists a  $\rho$ -zCDP algorithm that takes an input a dataset  $S \subset \mathcal{X}^n$  and w.p.  $\geq 1 - \beta$  returns a  $((1 + \gamma)r, \beta/2k)$ -stable

point provided that  $n \geq k \cdot m(r, \beta/2k)$  for  $k = \frac{C \left( \sqrt{d} + \sqrt{\log(\log(1/\beta)/\gamma)} \right) \sqrt{\log(1/\gamma) \log(1/\beta)}}{\gamma \sqrt{\rho}}$ . Furthermore, if finding  $f(S')$  for any  $S'$  containing  $m(r, \beta/2k)$ -many datapoint takes  $\mathsf{T}$  time, then our algorithm runs in time  $O(k\mathsf{T} + k \cdot \frac{\log^2(1/\gamma) \log(1/\beta)}{\gamma^2})$ .

*Proof.* The proof simply partitions the  $n$  inputs points of  $S$  into  $k$  disjoint and random subsets  $S'_1, S'_2, \dots, S'_k$ . W.p.  $\geq 1 - \beta/2$  it holds that  $\|f(S'_i) - c\| \leq r$  for every subset  $S'_i$ , and then we apply our  $(1 + \gamma)$  approximation over this dataset of  $k$  many points (with a failure probability of  $\beta/2$ ) and returns the resulting center-point.  $\square$

This results improves on Theorem 18 of [21] in both the runtime and the required number of subsamples, at the expense of requiring *all* subsamples to be close to the point  $p$  rather than just many of the points.

## D Missing Proofs: Local-DP Algorithm

**Claim D.1.** Algorithm 5 is a local-model  $\rho$ -zCDP.

*Proof.* The proof is very similar to the proof of Lemma C.1 — where we apply basically the same accounting, noticing that each  $x \in P$  is in charge of randomizing her own data, making this algorithm LDP.  $\square$

**Lemma D.2.** W.p.  $\geq 1 - \beta$ , applying Algorithm 4 with  $r \geq r_{opt}$  and an initial center  $\theta_0$  s.t.  $\|\theta_0 - \theta_{opt}\| \leq 10r_{opt}$  returns a point  $\theta^t$  where  $|P \setminus B(\theta^t, (1 + \gamma)r)| \leq 88\sqrt{\frac{nRT}{\rho}} \left( \sqrt{d} + \sqrt{2 \ln(4nRT/\beta_0)} \right) + \sqrt{\frac{2R(T+1) \log(4R(T+1)/\beta_0)}{\rho}}$ .

*Proof.* Analogously to the proof of Lemma 4.1, we use the similar definitions: in each iteration  $t$  we denote  $n_w^t$  as the true number of datapoints in  $P$  outside the ball  $n_w^t = |\{x \in P : x \notin B(\theta^t, r)\}|$ ,<sup>8</sup>  $\mu_w^t$  as their true mean  $\mu_w^t = \frac{1}{n_w^t} \sum_{x \notin B(\theta^t, r)} x$ , and  $v_w^t$  as the difference of the true mean and the current center  $v_w^t = \mu_w^t - \theta^t = \frac{1}{n_w^t} \sum_{x \notin B(\theta^t, r)} (x - \theta^t)$ . We thus define the events

$$\mathcal{E}_1 := \text{in all } T + 1 \text{ iterations, } |\tilde{n}_w^t - n_w^t| \leq \sqrt{\frac{2nR(T+1) \log(4^{(T+1)}/\beta)}{\rho}}$$

$$\mathcal{E}_2 := \text{in all } T \text{ iterations, } \left\| \sum_x Z_x^t - n_w^t v_w^t \right\| \leq \frac{88r\sqrt{nRT}}{\sqrt{\rho}} \left( \sqrt{d} + \sqrt{2 \ln(4T/\beta)} \right)$$

Proving that both  $\Pr[\bar{\mathcal{E}}_1] \leq \beta/2$  and  $\Pr[\bar{\mathcal{E}}_2] \leq \beta/2$  is rather straight-forward. In each iteration  $t$  it holds that  $\sum_x Y_x^t \sim \mathcal{N}(n_w^t, n\sigma_{count}^2)$  as the sum on  $n$  independent Gaussians, and so we merely apply standard Gaussian concentration bounds together with the union bound over all  $T + 1$  iterations. Similarly, in each iteration  $t$  it holds that  $\sum_x Z_x^t \sim \mathcal{N}(n_w^t(\mu_x^t - \theta^t), n\sigma_{sum}^2 I_d)$ . So standard bounds on the concentration of the  $\chi_d^2$ -distribution assert that the  $L_2$ -distance between the random draw from such a  $d$ -dimensional Gaussian and its mean is  $> \sqrt{n\sigma_{sum}^2}(\sqrt{d} + \sqrt{2 \ln(4T/\beta)})$  w.p.  $< \frac{\beta}{2T}$ , after which we apply the union-bound on all  $T$  iterations. We continue the rest of the proof conditioning on both  $\mathcal{E}_1$  and  $\mathcal{E}_2$  holding.

<sup>8</sup>Where technically, in the last steps of the algorithm,  $n_w^T = |\{x \in P : x \notin B(\theta^T, (1 + \gamma)r)\}|$ .

Again, due to our if-condition, we make an update-step only when  $\tilde{n}_w^t$  is large, which, under  $\mathcal{E}_1$  implies that

$$n_w^t \geq \frac{88\sqrt{nRT}}{\sqrt{\rho}} \left( \sqrt{d} + \sqrt{2\ln(4RT/\beta_0)} \right) - \sqrt{\frac{2nR(T+1)\ln(4R(T+1)/\beta_0)}{\rho}} \geq 44|\Delta_{count}|$$

and then proving that the distribution which we use to make an update-step satisfies the conditions detailed in (2) w.h.p. is precisely the same proof (using the independence of  $\Delta_{count}$  and  $\Delta_{sum}$  and the fact that  $\mathbb{E}[\Delta_{sum}] = 0$ ).

Invoking Corollary 3.5 we have that if we make all  $T$  updates then indeed  $\|\theta^T - \theta_0\| \leq \gamma r$  and so  $|P \setminus B(\theta^T, (1+\gamma)R)| = 0$ . So under  $\mathcal{E}_1$  Algorithm 4 returns  $\theta^T$ . Otherwise, at some iteration we do not make an update step, which under  $\mathcal{E}_1$  suggest that

$$n_w^t = |P \setminus B(\theta^t, r)| \leq 88\sqrt{\frac{nRT}{\rho}} \left( \sqrt{d} + \sqrt{2\ln(4nRT/\beta_0)} \right) + \sqrt{\frac{2R(T+1)\log(4R(T+1)/\beta_0)}{\rho}}$$

□

**Corollary D.3.** Algorithm 3 altered so it invokes  $B = O(\log(1/\gamma))$  calls to Algorithm 5 (instead of Algorithm 4) is a  $O\left(\frac{\log(1/\beta)\log^2(1/\gamma)}{\gamma^2}\right)$ -rounds  $\rho$ -zCDP algorithm in the local-model that takes  $O\left(n \cdot \frac{\log^2(1/\gamma)\log(1/\beta)}{\gamma^2}\right)$ -time; and that returns a ball  $B(\theta^*, r^*)$  such that  $r^* \leq (1+3\gamma)r_{opt}$  and  $|P \setminus B(\theta^*, r^*)| = O\left(\frac{\sqrt{n}\left(\sqrt{d} + \sqrt{\log(\log(1/\beta)/\gamma)}\right)\sqrt{\log(1/\gamma)\log(1/\beta)}}{\gamma\sqrt{\rho}}\right)$ .

*Proof.* The proof follows from using the bound of Lemma D.2 with  $T = O(\gamma^{-2}\log(1/\gamma))$ , and with a privacy budget of  $\rho/B$  and failure probability of  $\beta/B$  in each invocation of Algorithm 5. □

## E Experiments

In this section we give an experimental evaluation of our algorithm on three synthetic datasets and one real dataset. We emphasize that our experiment should be perceived merely as a proof-of-concept experiment aimed at the possibility of improving the algorithm’s analysis, and not a thorough experimentation for a ready-to-deploy code. We briefly explain the experimental setup below.

**Goal.** We set to investigate the performance of our algorithm, and seeing whether the performance is similar across different types of input and across a range of parameters. In addition, we wondered whether in practice our algorithm halts prior to concluding all  $T = O(\gamma^{-2}\ln(1/\gamma))$  iterations.

**Experiment details.** We conducted experiments solely with Algorithm 4 with update-step that uses a constant learning rate of  $\gamma^2/8$ , feeding it the true  $r_{opt}$  of each given dataset as its  $r$  parameter. By default, we used the following set of parameters. Our domain in the synthetic experiments is  $[-5, 5]^{10}$  (namely, we work in the 10-dimensional space), and our starting point  $\theta_0$  is the origin. The default values of our privacy parameter is  $\rho = 0.3$ , of the approximation constant is 1.2 (namely  $\gamma = 0.2$ ), and of the failure probability is  $\beta = e^{-9} \approx 0.00012$ . We set the maximal number of repetitions  $T$  just as detailed in Algorithm 4, which depends on  $\gamma$ .

We varied two of the input parameters,  $\rho$  and  $\gamma$ , and also the data-type. We ran experiments with  $\rho \in \{0.1, 0.3, 0.5, 0.7, 0.9\}$  and with  $\gamma \in \{0.1, 0.2, 0.3, 0.4, 0.5\}$ . Based on the values of  $\rho$  and  $\gamma$  we computed  $n_0 = \frac{\sqrt{RT}(\sqrt{d} + \sqrt{\ln(4RT/\beta_0)})}{\sqrt{\rho}}$  which we used as our halting parameter. In all experiments involving a synthetic dataset, we set the input size  $n$  to be  $n = 640n_0$ .

We varied also the input type, using 3 synthetically generated datasets and one real-life dataset:

- **Spherical Gaussian:** we generated samples from a  $d$ -dimensional Gaussian  $\mathcal{N}(v, I_d)$ , where  $v \in \mathbb{R}^d$  is a random shift vector. We discarded each point that did not fall in  $[-5, 5]^{10}$ .
- **Product Distribution:** we generated samples from a  $d$ -dimensional Bernoulli distribution with support  $\{-1, 1\}^d$  with various probabilities for each dimension — where for each

coordinate  $i \in [10]$  we set  $\Pr[x_i = 1] = 2^{-i}$ . This creates a “skewed” distribution whose mean is quite far from its 1-center. In order for the 1-center not to coincide with  $\theta_0 = \bar{0}$  we shifted this cube randomly in the grid.

- **Conditional Gaussian:** we repeated the experiment with the spherical Gaussian only this time we conditioned our random draws so that no coordinate lies in the  $[0, 0.5]$ -interval. This skews the mean of the distribution to be  $< 0$  in each coordinate, but leaves the 1-center unaltered. Again, we shifted the Gaussian to a random point  $v \in [-5, 5]^d$ .
- **“Bar Crawl: Detecting Heavy Drinking”:** a dataset taken from the freely available UCI Machine Learning Repository [1] which collected accelerometer data from participants in a college bar crawl [26]. We truncated the data to only its 3  $x$ -,  $y$ - and  $z$ -coordinates, and dropped any entry outside of  $[-1, 1]^3$ , and since it has two points  $(-1, -1, -1)$  and  $(1, 1, 1)$  then its 1-center is the origin (so we shifted the data randomly in the  $[-5, 5]^3$  cube). This left us with  $n = 12,921,593$  points. Note that the data is taken from a very few participants, so our algorithm gives an event-level privacy [17].

We ran our experiments in Python, on a (fairly standard) Intel Core i7 2.80 GHz with 16GB RAM and they run in time that ranged from 15 seconds (for  $\gamma = 0.5$ ) to 2 hours (for  $\gamma = 0.1$ ).

**Results.** The results are given in Figures 2, 3, where we plotted the distance of  $\theta^t$  to  $\theta_{opt}$  for each set of parameters across  $t = 10$  repetitions. As evident, we converged to a good approximation of the MEB in all settings. We halt the experiment (i) if  $\|\theta_t - \theta_{opt}\| \leq \gamma r_{opt}$ , or (ii) if there are not enough wrong points, or (iii) if  $t > 2500$  indicating that the run isn’t converging. Indeed, the number of iterations until convergence does increase as  $\gamma$  decreases; but, rather surprisingly, varying  $\rho$  has a small effect on the halting time. This is somewhat expected as  $T$  has no dependency on  $\rho$  whereas its dependency on  $\gamma$  is proportional to  $\gamma^{-2}$ , but it is evident that as  $\rho$  increases our mean-estimation in each iteration becomes more accurate, so one would expect a faster convergence. Also unexpectedly, our results show that even for datasets whose mean and 1-center aren’t close to one another (such as the Conditional Gaussian or Product-Distribution), the number of iterations until convergence remains roughly the same (see for example Figure 2 vs. 3).

**Conclusions.** Our experiments suggest that indeed our bound  $T$  is a worst-case bound, where in all experiments we concluded in about 7 – 50 times faster than the bound of Algorithm 4. This suggests that perhaps one would be better off if instead of partitioning the privacy budget equally across all  $T$  iterations, they devise some sort of adaptive privacy budgeting. (E.g., using  $3\rho/4$  budget on the first  $T/4$  iterations and then the remaining  $\rho/4$  budget on the latter  $3T/4$  iterations.) Such adaptive budgeting is simple when using zCDP, as it does not require “privacy odometers” [33].

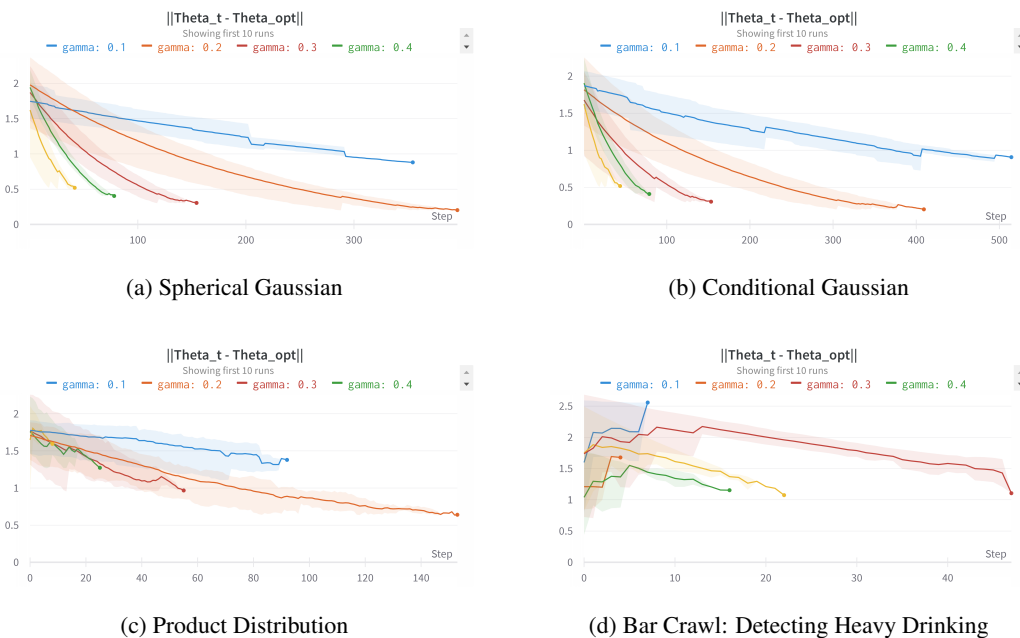

Figure 2: The distance of  $\theta^t$  to  $\theta_{opt}$  as a function of  $t$  – the iteration number, for  $\rho = 0.3$  and  $\gamma \in \{0.1, 0.2, 0.3, 0.4, 0.5\}$ . Each curve corresponds to a different  $\gamma$  value. In all experiments the number of iterations until convergence does increase as  $\gamma$  decreases, except for  $\gamma = 0.1$  where it halts because there were not enough wrong points. Note that for  $\gamma = 0.1$  for Bar Crawl dataset (figure 2d) we didn't converge due to its size.

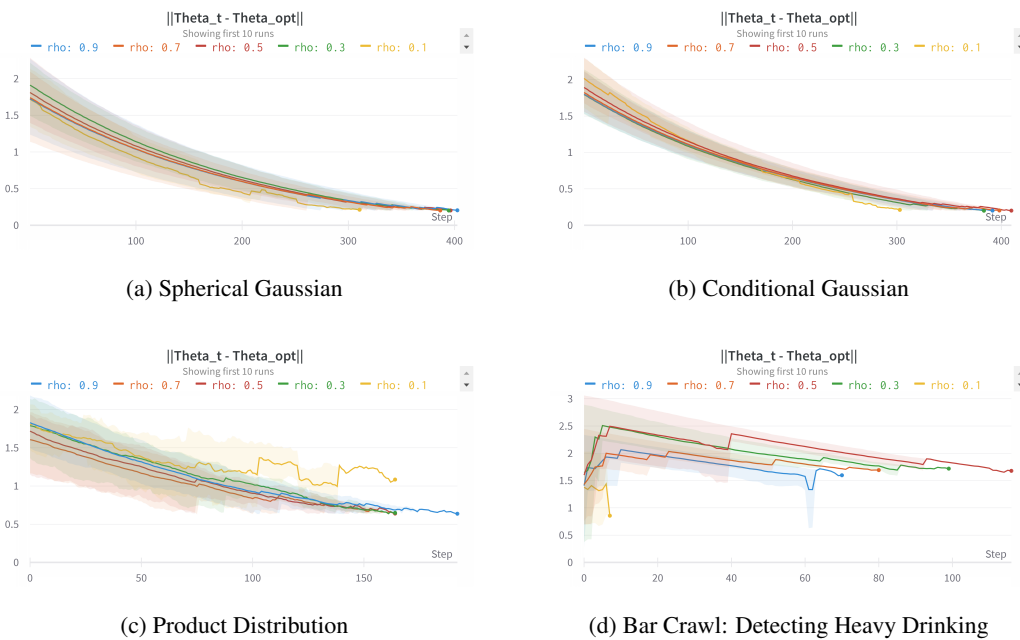

Figure 3: The distance of  $\theta^t$  to  $\theta_{opt}$  as a function of  $t$  – the iteration number, for  $\gamma = 0.2$  and  $\rho \in \{0.1, 0.3, 0.5, 0.7, 0.9\}$ . Each curve corresponds to a different  $\rho$  value. In all experiments varying  $\rho$  has a small effect on the halting time.
